# Supplementary material for: Integration of Transcriptome and Metabolome Reveals the Formation Mechanism of Red Stem in Prunus mume
Source: Front Plant Sci. 2022 May 6;13:884883. doi: 10.3389/fpls.2022.884883 (PMC9120947; doi:10.3389/fpls.2022.884883)
Supplement: Supplementary Table S5 — DEGs related to flavonoid transport. [file Table_5.xls]

## Sheet: Sheet1
Table S5. DEGs related to flavonoid transport
#ID	gene_name	T01_FPKM	T01_count	T02_FPKM	T02_count	T03_FPKM	T03_count	T04_FPKM	T04_count	T05_FPKM	T05_count	T06_FPKM	T06_count	T07_FPKM	T07_count	T08_FPKM	T08_count	T05_T06_T07_vs_T01_T02_T03_T04_DESeq_FDR	T05_T06_T07_vs_T01_T02_T03_T04_DESeq_log2FC	T05_T06_T07_vs_T01_T02_T03_T04_DESeq_(FDR_0.01_FC_2)_regulated	COG_class	COG_class_annotation	GO_annotation	KEGG_annotation	KEGG_pathway_annotation	KOG_class	KOG_class_annotation	Pfam_annotation	Swiss_Prot_annotation	eggNOG_class	eggNOG_class_annotation	NR_annotation
Prunus_mume_newGene_580	--	11.5349	470	12.5534	424	9.55603	376	11.761	489	0	0	0	0	0	0	0	0	2.81e-23	Inf	up	--	--	--	--	--	--	--	No apical meristem-associated C-terminal domain	--	--	--	glutathione S-transferase T3-like [Prunus avium]
Prunus_mume_newGene_3781	--	0.075785	3	0.011992	1	0.136211	6	0.24308	10	1.88171	84	2.35858	90	3.71795	146	4.34425	148	5.4e-06	-4.34466	down	--	--	--	--	--	--	--	No apical meristem-associated C-terminal domain	--	--	--	glutathione S-transferase T3-like [Prunus avium]
Prunus_mume_newGene_3597	--	0.894004	48	1.1726	53	0.251673	14	1.1128	61	0	0	0	0	0	0	0	0	7.41e-08	Inf	up	--	--	Cellular Component: membrane (GO:0016020);; Molecular Function: hydro-lyase activity (GO:0016836);; Molecular Function: racemase and epimerase activity (GO:0016854);; Cellular Component: intracellular membrane-bounded organelle (GO:0043231);; Cellular Component: cytoplasmic part (GO:0044444);; Biological Process: nicotinamide nucleotide metabolic process (GO:0046496);;	K17757|5.92133e-14|pmum:103322821|K17757 ATP-dependent NAD(P)H-hydrate dehydratase [EC:4.2.1.93] | (RefSeq) ATP-dependent (S)-NAD(P)H-hydrate dehydratase	--	[G]	Carbohydrate transport and metabolism	--	ATP-dependent (S)-NAD(P)H-hydrate dehydratase OS=Arabidopsis thaliana OX=3702 GN=At5g19150 PE=1 SV=1	G	Carbohydrate transport and metabolism	PREDICTED: ATP-dependent (S)-NAD(P)H-hydrate dehydratase [Prunus mume]
Prunus_mume_newGene_2986	--	11.4457	148	8.70147	94	7.26493	91	8.98809	119	0	0	0	0	0	0	0	0	7.06e-11	Inf	up	--	--	--	--	--	--	--	--	--	--	--	glutathione S-transferase T3-like [Prunus avium]
Prunus_mume_newGene_2413	--	0.516637	53	0.894378	58	1.46618	104	1.31373	103	0.055185	7	0.044138	5	0.175227	19	0.24736	22	0.0073031	3.05102	up	[V]	Defense mechanisms	Molecular Function: ATP binding (GO:0005524);; Cellular Component: integral component of membrane (GO:0016021);; Molecular Function: ATPase activity, coupled to transmembrane movement of substances (GO:0042626);; Biological Process: transmembrane transport (GO:0055085);;	K05658|0|pper:PRUPE_ppa020815mg|K05658 ATP-binding cassette, subfamily B (MDR/TAP), member 1 [EC:3.6.3.44] | (RefSeq) hypothetical protein	ABC transporters (ko02010)	[Q]	Secondary metabolites biosynthesis, transport and catabolism	ABC transporter;; ABC transporter transmembrane region;; ABC transporter transmembrane region	ABC transporter B family member 11 OS=Arabidopsis thaliana OX=3702 GN=ABCB11 PE=2 SV=1	V	Defense mechanisms	ABC transporter B family member 11-like [Prunus avium]
Prunus_mume_newGene_1153	--	1.18809	70	1.8592	104	2.18501	125	2.48615	162	0.050319	5	0	0	0	0	0	0	4.55e-08	6.30862	up	[T]	Signal transduction mechanisms	Molecular Function: ATP binding (GO:0005524);; Cellular Component: plasma membrane (GO:0005886);; Biological Process: drug transmembrane transport (GO:0006855);; Molecular Function: xenobiotic-transporting ATPase activity (GO:0008559);; Cellular Component: integral component of membrane (GO:0016021);; Biological Process: xenobiotic transport (GO:0042908);;	--	--	[Q]	Secondary metabolites biosynthesis, transport and catabolism	ABC transporter;; ABC transporter	ABC transporter G family member 24 OS=Arabidopsis thaliana OX=3702 GN=ABCG24 PE=2 SV=2	V	Defense mechanisms	Phosphonate C-P lyase system [Trema orientalis]
gene9519	LOC103325853	2.31944	94	4.99644	168	9.06513	355	6.93149	287	0.164125	8	0.099371	5	0.190734	8	1.32721	49	4.66e-05	5.14861	up	[O]	Posttranslational modification, protein turnover, chaperones	--	K00799|2.22855e-157|pmum:103325853|K00799 glutathione S-transferase [EC:2.5.1.18] | (RefSeq) probable glutathione S-transferase parC	Glutathione metabolism (ko00480)	[O]	Posttranslational modification, protein turnover, chaperones	Glutathione S-transferase, N-terminal domain;; Glutathione S-transferase, C-terminal domain;; Glutathione S-transferase, N-terminal domain;; Glutathione S-transferase, C-terminal domain;; Glutathione S-transferase, N-terminal domain	Probable glutathione S-transferase parC GN=PARC OS=Nicotiana tabacum (Common tobacco) PE=2 SV=1	O	Posttranslational modification, protein turnover, chaperones	PREDICTED: probable glutathione S-transferase parC [Prunus mume]
gene4821	LOC103320897	0.157697	21	0.184949	21	1.14722	146	0.276314	38	2.54051	389	7.96091	1045	7.32632	986	5.25085	617	0.000138045	-3.70167	down	--	--	--	K05387|0|pper:PRUPE_ppa017927mg|K05387 glutamate receptor, ionotropic, plant | (RefSeq) hypothetical protein	--	[PET]	Inorganic ion transport and metabolism;; Amino acid transport and metabolism;; Signal transduction mechanisms	Receptor family ligand binding region;; Ligand-gated ion channel;; Bacterial extracellular solute-binding proteins, family 3;; Periplasmic binding protein	Glutamate receptor 2.8 (Precursor) GN=T9I4.19 OS=Arabidopsis thaliana (Mouse-ear cress) PE=2 SV=2	P	Inorganic ion transport and metabolism	PREDICTED: glutamate receptor 2.8-like [Prunus mume]
gene3804	LOC103319588	12.8416	1132	17.0189	1294	7.6818	604	20.4798	2168	0.965549	225	0.75558	153	1.0949	214	0.443551	78	0.00232557	2.82011	up	[V]	Defense mechanisms	--	K03327|0|pmum:103319588|K03327 multidrug resistance protein, MATE family | (RefSeq) protein DETOXIFICATION 27-like	--	[R]	General function prediction only	MatE	Protein TRANSPARENT TESTA 12 GN=F17J16_80 OS=Arabidopsis thaliana (Mouse-ear cress) PE=2 SV=1	S	Function unknown	PREDICTED: protein DETOXIFICATION 27-like [Prunus mume]
gene3276	LOC103319006	106.839	8531	91.8979	6088	23.6238	1822	37.5448	3062	209.83	19643	290.43	23214	189.916	15577	63.781	4566	6.25e-05	-1.88647	down	[Q]	Secondary metabolites biosynthesis, transport and catabolism	--	K09754|0|pmum:103319006|K09754 coumaroylquinate(coumaroylshikimate) 3'-monooxygenase [EC:1.14.13.36] | (RefSeq) cytochrome P450 98A2-like	Phenylpropanoid biosynthesis (ko00940);; Flavonoid biosynthesis (ko00941);; Stilbenoid, diarylheptanoid and gingerol biosynthesis (ko00945)	[Q]	Secondary metabolites biosynthesis, transport and catabolism	Cytochrome P450	Cytochrome P450 98A2 GN=CYP98A2 OS=Glycine max (Soybean) PE=2 SV=1	Q	Secondary metabolites biosynthesis, transport and catabolism	PREDICTED: cytochrome P450 98A2-like [Prunus mume]
gene26348	LOC103344449	34.4746	665	31.1456	498	13.5397	252	15.6826	309	107.682	2418	96.982	1869	62.0201	1226	24.5386	423	3.33e-05	-1.96542	down	[Q]	Secondary metabolites biosynthesis, transport and catabolism	Molecular Function: monooxygenase activity (GO:0004497);; Molecular Function: iron ion binding (GO:0005506);; Molecular Function: electron carrier activity (GO:0009055);; Molecular Function: oxidoreductase activity, acting on paired donors, with incorporation or reduction of molecular oxygen (GO:0016705);; Molecular Function: heme binding (GO:0020037);; Biological Process: oxidation-reduction pro…	K09754|4.73829e-103|pmum:103344449|K09754 coumaroylquinate(coumaroylshikimate) 3'-monooxygenase [EC:1.14.13.36] | (RefSeq) cytochrome P450 98A2-like	Phenylpropanoid biosynthesis (ko00940);; Flavonoid biosynthesis (ko00941);; Stilbenoid, diarylheptanoid and gingerol biosynthesis (ko00945)	[Q]	Secondary metabolites biosynthesis, transport and catabolism	Cytochrome P450	Cytochrome P450 98A2 GN=CYP98A2 OS=Glycine max (Soybean) PE=2 SV=1	Q	Secondary metabolites biosynthesis, transport and catabolism	PREDICTED: cytochrome P450 98A2-like, partial [Prunus mume]
gene25828	LOC103343913	24.9182	475	28.2056	446	22.597	416	25.2572	492	1.27009	29	2.20937	43	2.3305	46	4.36826	75	1.59e-07	3.64537	up	[Q]	Secondary metabolites biosynthesis, transport and catabolism	--	--	--	[QI]	Secondary metabolites biosynthesis, transport and catabolism;; Lipid transport and metabolism	Cytochrome P450	Cytochrome P450 714A1 GN=F6A4.120 OS=Arabidopsis thaliana (Mouse-ear cress) PE=2 SV=1	Q	Secondary metabolites biosynthesis, transport and catabolism	PREDICTED: cytochrome P450 714C2-like, partial [Prunus mume]
gene24162	LOC107880141	7.81855	666	12.5252	883	9.39611	773	4.29434	373	1.00747	100	1.07829	92	2.07999	173	2.78921	202	0.000735992	2.61187	up	[Q]	Secondary metabolites biosynthesis, transport and catabolism	--	K15639|0|pmum:103342107|K15639 PHYB activation tagged suppressor 1 [EC:1.14.-.-] | (RefSeq) cytochrome P450 CYP749A22-like	Brassinosteroid biosynthesis (ko00905)	[QI]	Secondary metabolites biosynthesis, transport and catabolism;; Lipid transport and metabolism	Cytochrome P450	Cytochrome P450 CYP749A22 OS=Panax ginseng (Korean ginseng) PE=2 SV=1	Q	Secondary metabolites biosynthesis, transport and catabolism	PREDICTED: cytochrome P450 CYP749A22-like [Prunus mume]
gene22477	LOC103340132	0.421992	46	0.335523	32	0.076718	9	0.084547	10	3.75603	445	3.38783	369	2.2114	239	1.85676	181	5.87e-07	-3.72835	down	--	--	--	--	--	[I]	Lipid transport and metabolism	CRAL/TRIO domain;; CRAL/TRIO, N-terminal domain;; Divergent CRAL/TRIO domain	Phosphatidylinositol/phosphatidylcholine transfer protein SFH10 GN=SFH10 OS=Arabidopsis thaliana (Mouse-ear cress) PE=3 SV=1	I	Lipid transport and metabolism	PREDICTED: phosphatidylinositol/phosphatidylcholine transfer protein SFH12-like isoform X1 [Prunus mume]
gene20240	LOC107881589	1.73304	138	2.40551	159	0.916346	71	0.818359	67	0.08359	8	0.14811	12	0.022208	2	0.014148	2	0.000144314	4.02769	up	--	--	--	--	--	[GC]	Carbohydrate transport and metabolism;; Energy production and conversion	UDP-glucoronosyl and UDP-glucosyl transferase	Hydroquinone glucosyltransferase GN=AS OS=Rauvolfia serpentina (Serpentine wood) PE=1 SV=1	CG	Energy production and conversion;; Carbohydrate transport and metabolism	PREDICTED: hydroquinone glucosyltransferase-like [Prunus mume]
gene19618	LOC103336995	6.0567	359	3.58396	176	4.42632	253	3.39947	206	1.40488	97	0.238082	15	0.031318	2	0	0	0.00142081	2.87675	up	[R]	General function prediction only	--	--	--	[QR]	Secondary metabolites biosynthesis, transport and catabolism;; General function prediction only	2OG-Fe(II) oxygenase superfamily	Probable 2-oxoglutarate-dependent dioxygenase AOP1.2 GN=AOP1.2 OS=Arabidopsis thaliana (Mouse-ear cress) PE=2 SV=1	Q	Secondary metabolites biosynthesis, transport and catabolism	PREDICTED: probable inactive 2-oxoglutarate-dependent dioxygenase AOP2 [Prunus mume]
gene18878	LOC103336181	30.5165	3571	29.6461	2878	23.3832	2643	26.8696	3210	13.9568	1903	7.30754	855	6.49905	780	4.46445	468	0.00244972	1.51867	up	[J]	Translation, ribosomal structure and biogenesis	Molecular Function: glutamate-tRNA ligase activity (GO:0004818);; Molecular Function: ATP binding (GO:0005524);; Cellular Component: cytoplasm (GO:0005737);; Biological Process: glutamyl-tRNA aminoacylation (GO:0006424);;	K01885|0|pmum:103336181|K01885 glutamyl-tRNA synthetase [EC:6.1.1.17] | (RefSeq) glutamate--tRNA ligase, cytoplasmic-like	Porphyrin and chlorophyll metabolism (ko00860);; Aminoacyl-tRNA biosynthesis (ko00970)	[J]	Translation, ribosomal structure and biogenesis	tRNA synthetases class I (E and Q), catalytic domain;; tRNA synthetases class I (E and Q), anti-codon binding domain;; Glutathione S-transferase, C-terminal domain	Glutamine--tRNA ligase OS=Lupinus luteus (European yellow lupin) PE=2 SV=2	J	Translation, ribosomal structure and biogenesis	PREDICTED: glutamate--tRNA ligase, cytoplasmic-like [Prunus mume]
gene18635	LOC103335906	35.9092	2177	28.115	1416	10.9007	640	18.649	1161	72.4013	5146	63.5549	3918	51.1218	3200	30.5236	1660	0.00121109	-1.48692	down	[R]	General function prediction only	--	--	--	[QR]	Secondary metabolites biosynthesis, transport and catabolism;; General function prediction only	2OG-Fe(II) oxygenase superfamily;; non-haem dioxygenase in morphine synthesis N-terminal	Flavonol synthase/flavanone 3-hydroxylase GN=FLS OS=Citrus unshiu (Satsuma mandarin) PE=1 SV=1	Q	Secondary metabolites biosynthesis, transport and catabolism	PREDICTED: protein DMR6-LIKE OXYGENASE 2-like [Prunus mume]
gene17591	LOC103334757	0.505196	38	3.09086	189	1.91156	136	0.468215	36	9.95832	753	5.66875	370	15.2915	1014	1.85641	123	0.00342757	-2.64169	down	[Q]	Secondary metabolites biosynthesis, transport and catabolism	--	--	--	[QI]	Secondary metabolites biosynthesis, transport and catabolism;; Lipid transport and metabolism	Cytochrome P450	Cytochrome P450 87A3 GN=OSJNBa0088I22.16 OS=Oryza sativa subsp. japonica (Rice) PE=2 SV=3	Q	Secondary metabolites biosynthesis, transport and catabolism	PREDICTED: cytochrome P450 87A3-like [Prunus mume]
gene17249	LOC103334369	1.59396	68	3.04926	108	0.967942	40	0.404229	18	0	0	0	0	0	0	0	0	0.000497726	Inf	up	[O]	Posttranslational modification, protein turnover, chaperones	Molecular Function: lactoylglutathione lyase activity (GO:0004462);; Molecular Function: transferase activity (GO:0016740);;	K00799|2.11132e-162|pmum:103334369|K00799 glutathione S-transferase [EC:2.5.1.18] | (RefSeq) probable glutathione S-transferase	Glutathione metabolism (ko00480)	[O]	Posttranslational modification, protein turnover, chaperones	Glutathione S-transferase, N-terminal domain;; Glutathione S-transferase, N-terminal domain;; Glutathione S-transferase, N-terminal domain;; Glutathione S-transferase, C-terminal domain	Glutathione transferase GST 23 OS=Zea mays (Maize) PE=2 SV=1	O	Posttranslational modification, protein turnover, chaperones	PREDICTED: probable glutathione S-transferase isoform X1 [Prunus mume]
gene16158	LOC103333409	1.9679	96	0.360971	15	0.130387	7	0.319986	16	5.25657	298	8.97664	437	8.67698	433	10.5779	460	2.38e-06	-3.48924	down	[Q]	Secondary metabolites biosynthesis, transport and catabolism	Molecular Function: monooxygenase activity (GO:0004497);; Molecular Function: iron ion binding (GO:0005506);; Molecular Function: electron carrier activity (GO:0009055);; Molecular Function: oxidoreductase activity, acting on paired donors, with incorporation or reduction of molecular oxygen (GO:0016705);; Molecular Function: heme binding (GO:0020037);; Biological Process: oxidation-reduction pro…	--	--	[Q]	Secondary metabolites biosynthesis, transport and catabolism	Cytochrome P450	Cytochrome P450 89A2 GN=F13O11.20 OS=Arabidopsis thaliana (Mouse-ear cress) PE=2 SV=2	Q	Secondary metabolites biosynthesis, transport and catabolism	PREDICTED: cytochrome P450 89A2-like, partial [Prunus mume]
gene12384	LOC103328991	2.24877	213	0.864376	68	1.0815	99	3.44434	332	0.030222	4	0.01801	2	0.006775	1	0.004535	1	6.95e-05	6.3418	up	[GC]	Carbohydrate transport and metabolism;; Energy production and conversion	Biological Process: metabolic process (GO:0008152);; Molecular Function: transferase activity, transferring hexosyl groups (GO:0016758);;	--	--	[GC]	Carbohydrate transport and metabolism;; Energy production and conversion	UDP-glucoronosyl and UDP-glucosyl transferase	UDP-glucose flavonoid 3-O-glucosyltransferase 6 {ECO:0000303|PubMed:18487633} OS=Fragaria ananassa (Strawberry) PE=1 SV=1	CG	Energy production and conversion;; Carbohydrate transport and metabolism	PREDICTED: UDP-glycosyltransferase 71A16-like [Prunus mume]
gene12292	LOC103329043	1.08016	133	1.17112	97	2.86839	135	0.648493	86	2.76743	413	7.1436	588	6.45339	811	3.08227	170	0.000316503	-2.30942	down	--	--	--	--	--	[IT]	Lipid transport and metabolism;; Signal transduction mechanisms	NB-ARC domain	Diacylglycerol kinase 5 GN=DGK5 OS=Arabidopsis thaliana (Mouse-ear cress) PE=2 SV=1	R	General function prediction only	PREDICTED: uncharacterized protein LOC103329043 [Prunus mume]
gene11173	LOC103327785	4.22434	251	3.44386	181	4.43257	310	8.61072	479	0.387414	27	0.459136	33	0.524941	33	1.10545	45	2.38e-05	3.39018	up	[R]	General function prediction only	--	K13566|0|pmum:103327785|K13566 omega-amidase [EC:3.5.1.3] | (RefSeq) omega-amidase, chloroplastic-like	Alanine, aspartate and glutamate metabolism (ko00250)	[E]	Amino acid transport and metabolism	Carbon-nitrogen hydrolase	Omega-amidase,chloroplastic (Precursor) GN=NLP3 OS=Arabidopsis thaliana (Mouse-ear cress) PE=1 SV=1	R	General function prediction only	PREDICTED: omega-amidase, chloroplastic-like [Prunus mume]
gene11130	LOC103327619	364.526	30882	381.895	26843	413.258	33815	383.208	33150	87.7332	8662	66.2819	5615	26.8837	2336	52.2958	3962	1.97e-06	2.631	up	[Q]	Secondary metabolites biosynthesis, transport and catabolism	--	--	--	[Q]	Secondary metabolites biosynthesis, transport and catabolism	Cytochrome P450	Cytochrome P450 71A1 GN=CYP71A1 OS=Persea americana (Avocado) PE=1 SV=2	Q	Secondary metabolites biosynthesis, transport and catabolism	PREDICTED: cytochrome P450 71A1-like [Prunus mume]
gene10864	LOC103327342	31.8148	2747	35.5872	2549	10.9923	917	18.2305	1607	2.38253	240	2.92035	253	5.96246	528	4.15105	321	0.00499661	2.6302	up	[IQ]	Lipid transport and metabolism;; Secondary metabolites biosynthesis, transport and catabolism	--	--	--	[I]	Lipid transport and metabolism	AMP-binding enzyme;; AMP-binding enzyme C-terminal domain	Probable acyl-activating enzyme 5, peroxisomal GN=MQK4.9 OS=Arabidopsis thaliana (Mouse-ear cress) PE=2 SV=1	I	Lipid transport and metabolism	PREDICTED: probable acyl-activating enzyme 5, peroxisomal [Prunus mume]
gene10228	LOC103326652	2.60495	214	1.81365	124	3.2226	256	2.16761	182	0	0	0.63421	53	0.616236	52	0.991795	73	0.00817341	2.54734	up	[Q]	Secondary metabolites biosynthesis, transport and catabolism	--	K20562|0|pmum:103326652|K20562 biphenyl-4-hydroxylase | (RefSeq) cytochrome P450 CYP736A12-like	--	[Q]	Secondary metabolites biosynthesis, transport and catabolism	Cytochrome P450	Cytochrome P450 CYP736A12 OS=Panax ginseng (Korean ginseng) PE=2 SV=1	Q	Secondary metabolites biosynthesis, transport and catabolism	PREDICTED: cytochrome P450 CYP736A12-like [Prunus mume]
